# Supplementary material for: Mechanism and proton activating factors in base-induced β-elimination reactions of 2-(2-chloroethyl)pyridine †
Source: Royal Society of Chemistry journal article supplement (doi:10.1039/b009716k), 2001-01-01
Supplement: b009716k.doc [file b009716k.doc]

##### Supplementary data

**Table S1** Pseudo-first order rate constants, kobs s-1, for the -elimination reactions with 2-(2-chloroethyl)pyridine in acetohydroxamate–acetohydroxamic acid buffer, 50 C,  = 1M KCl, at pH = 8.42 (B-/BH=0.186)

| **102 [B-] / (mol** **dm-3)** | **102 [BH] / (mol dm-3)** | **105 kobs / (s-1)** |
| --- | --- | --- |
| 0.634 | 3.41 | 0.277 |
| 1.27 | 6.83 | 0.485 |
| 1.98 | 10.7 | 0.708 |
| 2.54 | 13.7 | 0.989 |
| 3.17 | 17.0 | 1.17 |
| 3.73 | 20.1 | 1.29 |
| 4.39 | 23.6 | 1.55 |

**Table S2** Pseudo-first order rate constants, kobs s-1, for the -elimination reactions with 2-(2-chloroethyl)pyridine in acetohydroxamate–acetohydroxamic acid buffer, 50 C,  = 1M KCl, at pH = 8.74 (B-/BH=0.39)

| **102 [B-] / (mol** **dm-3)** | **102 [BH] / (mol** **dm-3)** | **105 kobs / (s-1)** |
| --- | --- | --- |
| 1.12 | 2.87 | 0.152 |
| 1.68 | 4.31 | 0.269 |
| 2.24 | 5.74 | 0.367 |
| 3.36 | 8.62 | 0.530 |
| 3.36 | 8.62 | 0.557 |
| 4.46 | 11.4 | 0.670 |
| 5.60 | 14.4 | 0.852 |
| 11.2 | 28.7 | 1.530 |

**Table S3** Pseudo-first order rate constants, kobs s-1, for the -elimination reactions with 2-(2-chloroethyl)pyridine in acetohydroxamate–acetohydroxamic acid buffer, 50 C,  = 1M KCl, at pH = 9.02 (B-/BH=0.74)

| **102 [B-] / (mol** **dm-3)** | **102 [BH] / (mol dm-3)** | **105 kobs / (s-1)** |
| --- | --- | --- |
| 1.18 | 1.59 | 0.114 |
| 2.36 | 3.19 | 0.223 |
| 3.55 | 4.80 | 0.326 |
| 4.73 | 6.39 | 0.428 |
| 6.0 | 8.11 | 0.553 |
| 7.09 | 9.58 | 0.568 |
| 8.0 | 10.81 | 0.780 |
| 11.82 | 15.97 | 1.08 |

**Table S4** Pseudo-first order rate constants, kobs s-1, for the -elimination reactions with 2-(2-chloroethyl)pyridine in acetohydroxamate–acetohydroxamic acid buffer 50 C,  = 1M KCl, at pH = 9.15 (B-/BH=1)

| **[B-] / (mol** **dm-3)** | **[BH] / (mol** **dm-3)** | **105 kobs / (s-1)** |
| --- | --- | --- |
| 0.01 | 0.01 | 0.0984 |
| 0.02 | 0.02 | 0.129 |
| 0.02 | 0.02 | 0.140 |
| 0.04 | 0.04 | 0.231 |
| 0.04 | 0.04 | 0.239 |
| 0.054 | 0.054 | 0.424 |
| 0.08 | 0.08 | 0.553 |
| 0.08 | 0.08 | 0.621 |
| 0.136 | 0.136 | 1.040 |
| 0.20 | 0.20 | 1.320 |

**Table S5** Pseudo-first order rate constants, kobs s-1, for the -elimination reactions with 2-(2-chloroethyl)pyridine in acetohydroxamate–acetohydroxamic acid buffer 50 C,  = 1M KCl, at pH = 9.42 (B-/BH=1.86)

| **[B-] / (mol** **dm-3)** | **[BH] / (mol** **dm-3)** | **105 kobs / (s-1)** |
| --- | --- | --- |
| 0.019 | 0.01 | 0.102 |
| 0.039 | 0.02 | 0.205 |
| 0.058 | 0.03 | 0.28 |
| 0.078 | 0.04 | 0.36 |
| 0.116 | 0.06 | 0.508 |
| 0.148 | 0.08 | 0.765 |
| 0.194 | 0.10 | 0.867 |
